# Supplementary material
Source: Springer Nature journal article supplement (https://www.springermedizin.de/resource/supplementary/13023_2014_771_MOESM6_ESM.pdf/9643036)

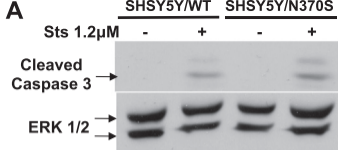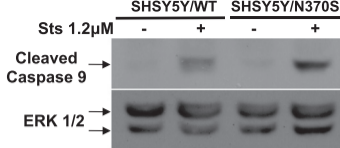

**B**

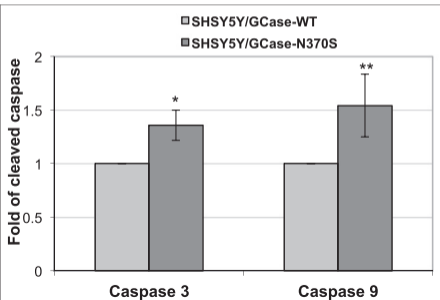

**C**

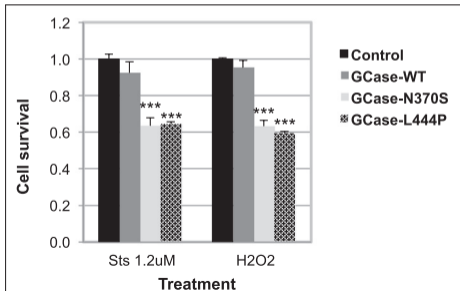

Supplement: MOESM6 [file 9643036]
